# Supplementary material
Source: PubMed Central journal article supplement (PMC2891412)
Supplement: NIHMS167859-supplement-01.pdf [file NIHMS167859-supplement-01.pdf]

## Appendix 1

Quintile cut-points of plasma concentrations of retinol and carotenoids among all control subjects (n = 560), Singapore Chinese Health Study

| Antioxidant                                  | Range of plasma concentrations of each antioxidant by quintile |                      |                      |                      |                        |
|----------------------------------------------|----------------------------------------------------------------|----------------------|----------------------|----------------------|------------------------|
|                                              | 1 <sup>st</sup> (low)                                          | 2 <sup>nd</sup>      | 3 <sup>rd</sup>      | 4 <sup>th</sup>      | 5 <sup>th</sup> (high) |
| $\alpha$ -carotene ( $\mu\text{mol/L}$ )     | <0.012 (63/113)                                                | 0.012-0.025 (58/112) | 0.025-0.036 (70/111) | 0.036-0.055 (52/112) | >0.055(37/112)         |
| $\beta$ -carotene ( $\mu\text{mol/L}$ )      | <0.171 (62/112)                                                | 0.171-0.286 (68/113) | 0.286-0.411 (60/111) | 0.411-0.610 (43/112) | >0.610 (47/112)        |
| Lycopene ( $\mu\text{mol/L}$ )               | <0.055 (63/112)                                                | 0.055-0.083 (53/112) | 0.083-0.117 (56/112) | 0.117-0.184 (59/112) | >0.184 (49/112)        |
| $\beta$ -cryptoxanthin ( $\mu\text{mol/L}$ ) | <0.101 (67/112)                                                | 0.101-0.167 (77/112) | 0.167-0.239 (54/112) | 0.239-0.392 (39/112) | >0.392 (43/112)        |
| Lutein( $\mu\text{mol/L}$ )                  | <0.283 (67/112)                                                | 0.283-0.383 (54/112) | 0.383-0.500 (60/113) | 0.500-0.664 (42/111) | >0.664 (57/112)        |
| Zeaxanthin ( $\mu\text{mol/L}$ )             | <0.040 (46/112)                                                | 0.040-0.066 (56/114) | 0.066-0.092 (60/110) | 0.092-0.141 (65/112) | >0.141 (53/112)        |
| Retinol ( $\mu\text{mol/L}$ )                | <1.832 (53/112)                                                | 1.832-2.111 (50/112) | 2.111-2.423 (58/112) | 2.423-2.761 (53/112) | >2.761 (66/112)        |

Number of acute myocardial infarction cases/number of control subjects in parenthesis.
